# Supplementary material
Source: publisher figshare collection journal article supplement (https://karger.figshare.com/ndownloader/files/12281141)
Supplement: Supplementary file 1 [file 12281141]

| PubMed, EMBASE and Medline search strategies | |
| --- | --- |
| **Medline(1966-2017) and**  **Embase(1974-2017)**  **via www.Embase.com** | **PubMed(1966-2017)** |
| 1. **'information system'[Emtree terms]** | 1. **Information Systems [Mesh Term]** |
| 1. **Software[Emtree terms]** | 1. **Software[Mesh Term]** |
| 1. **'computer assisted therapy'[Emtree terms]** | 1. **Therapy, Computer-Assisted[Mesh Term]** |
| 1. **'expert system'[Emtree terms]** | 1. **Expert system[Mesh Term]** |
| 1. **'decision support system'[Emtree terms]** | 1. **Decision** **Support** **Systems, Clinical [Mesh Term]** |
| 1. Decision Support | 1. Decision Support |
| 1. **1 or 2 or 3 or ~ or 6** | 1. **1 or 2 or 3 or ~ or 6** |
| 1. **'physician order entry system'[Emtree terms]** | 1. **Medical Order Entry Systems [Mesh Term]** |
| 1. **'computerized provider order entry'[Emtree terms]** | 1. Computerized Provider Order Entry |
| 1. Computerized Physician Order Entry | 1. Computerized Physician Order Entry |
| 1. Computerized Order Entry | 1. Computerized Order Entry |
| 1. Computerized Prescriptions | 1. Computerized Prescriptions |
| 1. Computerised Physician Order Entry | 1. Computerised Physician Order Entry |
| 1. Computerised Prescriptions | 1. Computerised Prescriptions |
| 1. Computerised Provider Order Entry | 1. Computerised Provider Order Entry |
| 1. **'electronic prescribing'[Emtree terms]** | 1. **Electronic Prescribing [Mesh Term]** |
| 1. E-Prescribing | 1. E-Prescribing |
| 1. Electronic Prescription | 1. Electronic Prescription |
| 1. E-Prescriptions | 1. E-Prescriptions |
| 1. E-Prescription | 1. E-Prescription |
| 1. Electronic Order Entry | 1. Electronic Order Entry |
| 1. Medication systems, hospital | 1. **Medication systems, hospital[ Mesh Term]** |
| 1. **'computer assisted drug therapy'[Emtree terms]** | 1. **Drug Therapy, Computer-Assisted[Mesh Term]** |
| 1. **8 or 9 or 10 or ~ or 23** | 1. **8 or 9 or 10 or ~ or 23** |
| 1. **Chemotherapy[Emtree terms]** | 1. Chemotherapy |
| 1. Chemotherapies | 1. Chemotherapies |
| 1. **'adjuvant chemotherapy'[Emtree terms]** | 1. **Chemotherapy, Adjuvant[Mesh Term]** |
| 1. Chemotherapy Agents | 1. Chemotherapy Agents |
| 1. Chemotherapy Drugs | 1. Chemotherapy Drugs |
| 1. Chemotherapeutic Anticancer Agents | 1. Chemotherapeutic Anticancer Agents |
| 1. **'antineoplastic agent'[Emtree terms]** | 1. **Antineoplastic Agents[Mesh Term]** |
| 1. Antineoplastic Drugs | 1. Antineoplastic Drugs |
| 1. Anticancer Medications | 1. Anticancer Medications |
| 1. Anti-Cancer Drugs | 1. Anti-Cancer Drugs |
| 1. **Oncology[Emtree terms]** | 1. Oncology |
| 1. [**Neoplasms**](https://www.ncbi.nlm.nih.gov/mesh/68009369)**[Emtree terms]** | 1. **Neoplasms**  **[Mesh Term]** |
| 1. **25 or 26 or ~ or 36** | 1. **25 or 26 or ~ or 36** |
| 1. [Drug Prescriptions](https://www.ncbi.nlm.nih.gov/mesh/68011307) | 1. **Drug Prescriptions [Mesh Term)** |
| 1. Prescribing | 1. Prescribing |
| 1. **Prescription[Emtree terms]** | 1. Prescription |
| 1. Order Entry | 1. Order Entry |
| 1. Medication | 1. Medication |
|  | 1. Protocol |
| 1. **38 or 39 ~ or 42** | 1. **38 or 39 ~ or 43** |
| **(7 and 37 and 43) or ( 24 and 37) Filters:** English Language **-**Human | **(7 and 37and 44) or ( 24 and 37)Filters:** English Language **-**Human |
